# Supplementary material
Source: ML conference proceedings conference paper supplement (https://proceedings.neurips.cc/paper_files/paper/2020/hash/92977ae4d2ba21425a59afb269c2a14e-Abstract.html)
Supplement: Supplementary file [file 92977ae4d2ba21425a59afb269c2a14e-Supplemental.pdf]

## 9 Appendix

For all the following derivations, we use  $\mathbb{D}_{\text{KL}}[P(X)||Q(X)]$  to denote the KL-divergence between two distributions  $P$  and  $Q$ :

$$\mathbb{D}_{\text{KL}}[P(X)||Q(X)] = \mathbb{E}_{x \sim p(x)} \log \frac{p(x)}{q(x)} = \int_X p(x) \log \frac{p(x)}{q(x)} dx.$$

Accordingly, when  $P(X|Z)$  and  $Q(X|Z)$  are *conditional* distributions,  $\mathbb{D}_{\text{KL}}[P||Q]$  denotes their *conditional* KL-divergence:

$$\mathbb{D}_{\text{KL}}[P(X|Z)||Q(X|Z)] = \int_{Z \times X} p(z)p(x|z) \log \frac{p(x|z)}{q(x|z)} dx dz.$$

For simplicity, we will equivalently use  $\mathbb{E}_{x \sim p(x)}[\cdot]$  and  $\mathbb{E}_{p(x)}[\cdot]$  to denote certain expectation in which  $x$  is sampled from the distribution  $P(X)$ .

### 9.1 Derivation of Surrogate Objective

We first refer Lemma 1 from [10] for a complete presentation:

**Lemma 1.**

$$\mathbb{D}_{\text{KL}}[\mu^\pi(s, a, s')||\mu^E(s, a, s')] = \mathbb{D}_{\text{KL}}[\mu^\pi(s, a)||\mu^E(s, a)].$$

*Proof.*

$$\begin{aligned} \mathbb{D}_{\text{KL}}[\mu^\pi(s, a, s')||\mu^E(s, a, s')] &= \int_{\mathcal{S} \times \mathcal{A} \times \mathcal{S}} \mu^\pi(s, a, s') \log \frac{\mu^\pi(s, a) \cdot P(s'|s, a)}{\mu^E(s, a) \cdot P(s'|s, a)} ds' dads \\ &= \int_{\mathcal{S} \times \mathcal{A} \times \mathcal{S}} \mu^\pi(s, a, s') \log \frac{\mu^\pi(s, a)}{\mu^E(s, a)} ds' dads \\ &= \int_{\mathcal{S} \times \mathcal{A}} \mu^\pi(s, a) \log \frac{\mu^\pi(s, a)}{\mu^E(s, a)} dads \\ &= \mathbb{D}_{\text{KL}}[\mu^\pi(s, a)||\mu^E(s, a)]. \end{aligned}$$

□

**Lemma 2.**

$$\mathbb{D}_{\text{KL}}[\mu^\pi(s, s')||\mu^E(s, s')] \leq \mathbb{D}_{\text{KL}}[\mu^\pi(s, a)||\mu^E(s, a)].$$

*Proof.* As defined in Table 1,  $\mu^\pi(a|s, s')$  is the inverse-action transition probability induced by policy  $\pi$ :

$$\mu^\pi(a|s, s') = \frac{\mu^\pi(s, a, s')}{\mu^\pi(s, s')} = \frac{\cancel{\mu^\pi(s)} \pi(a|s) P(s'|s, a)}{\int_{\mathcal{A}} \cancel{\mu^\pi(s)} \pi(\bar{a}|s) P(s'|s, \bar{a}) d\bar{a}} = \frac{\pi(a|s) P(s'|s, a)}{\int_{\mathcal{A}} \pi(\bar{a}|s) P(s'|s, \bar{a}) d\bar{a}}.$$

Based on this notion, we can derive:

$$\begin{aligned} &\mathbb{D}_{\text{KL}}[\mu^\pi(s, a)||\mu^E(s, a)] \\ &= \underbrace{\mathbb{D}_{\text{KL}}[\mu^\pi(s, a, s')||\mu^E(s, a, s')]}_{\text{Lemma 1}} \\ &= \int_{\mathcal{S} \times \mathcal{A} \times \mathcal{S}} \mu^\pi(s, a, s') \log \frac{\mu^\pi(s, a, s')}{\mu^E(s, a, s')} ds' dads \\ &= \int_{\mathcal{S} \times \mathcal{A} \times \mathcal{S}} \mu^\pi(s, s') \mu^\pi(a|s, s') \log \frac{\mu^\pi(s, s') \times \mu^\pi(a|s, s')}{\mu^E(s, s') \times \mu^E(a|s, s')} ds' dads \end{aligned}$$

$$\begin{aligned}
&= \int_{\mathcal{S} \times \mathcal{A} \times \mathcal{S}} \mu^\pi(s, s') \mu^\pi(a|s, s') \log \frac{\mu^\pi(s, s')}{\mu^E(s, s')} ds' dad s + \int_{\mathcal{S} \times \mathcal{A} \times \mathcal{S}} \mu^\pi(s, s') \mu^\pi(a|s, s') \log \frac{\mu^\pi(a|s, s')}{\mu^E(a|s, s')} ds' dad s \\
&= \int_{\mathcal{S} \times \mathcal{A} \times \mathcal{S}} \mu^\pi(s, s') \log \frac{\mu^\pi(s, s')}{\mu^E(s, s')} ds' ds + \mathbb{D}_{\text{KL}}[\mu^\pi(a|s, s') || \mu^E(a|s, s')] \\
&= \mathbb{D}_{\text{KL}}[\mu^\pi(s, s') || \mu^E(s, s')] + \mathbb{D}_{\text{KL}}[\mu^\pi(a|s, s') || \mu^E(a|s, s')] \\
&\geq \mathbb{D}_{\text{KL}}[\mu^\pi(s, s') || \mu^E(s, s')].
\end{aligned} \tag{12}$$

□

Based on Lemma2, we can derive the upper-bound of our original objective:

**Theorem 1** (Surrogate Objective as the Divergence Upper-bound).

$$\mathbb{D}_{\text{KL}}[\mu^\pi(s, s') || \mu^E(s, s')] \leq \mathbb{E}_{\mu^\pi(s, s')} [\log \frac{\mu^R(s, s')}{\mu^E(s, s')}] + \mathbb{D}_{\text{KL}}[\mu^\pi(s, a) || \mu^R(s, a)].$$

*Proof.*

$$\begin{aligned}
\mathbb{D}_{\text{KL}}[\mu^\pi(s, s') || \mu^E(s, s')] &= \int_{\mathcal{S} \times \mathcal{S}} \mu^\pi(s, s') \log \frac{\mu^\pi(s, s')}{\mu^E(s, s')} ds ds' \\
&= \int_{\mathcal{S} \times \mathcal{S}} \mu^\pi(s, s') \log \left( \frac{\mu^R(s, s')}{\mu^E(s, s')} \times \frac{\mu^\pi(s, s')}{\mu^R(s, s')} \right) ds ds' \\
&= \int_{\mathcal{S} \times \mathcal{S}} \mu^\pi(s, s') \log \frac{\mu^R(s, s')}{\mu^E(s, s')} ds ds' + \int_{\mathcal{S} \times \mathcal{A}} \mu^\pi(s, s') \log \frac{\mu^\pi(s, s')}{\mu^R(s, s')} ds ds' \\
&= \mathbb{E}_{\mu^\pi(s, s')} [\log \frac{\mu^R(s, s')}{\mu^E(s, s')}] + \mathbb{D}_{\text{KL}}[\mu^\pi(s, s') || \mu^R(s, s')] \\
&\leq \mathbb{E}_{\mu^\pi(s, s')} [\log \frac{\mu^R(s, s')}{\mu^E(s, s')}] + \underbrace{\mathbb{D}_{\text{KL}}[\mu^\pi(s, a) || \mu^R(s, a)]}_{\text{derived from Lemma 2}}.
\end{aligned}$$

□

## 9.2 Connections between LfO and LfD

**Theorem 2.**

$$\mathbb{D}_{\text{KL}}[\mu^\pi(a|s, s') || \mu^E(a|s, s')] = \mathbb{D}_{\text{KL}}[\mu^\pi(s, a) || \mu^E(s, a)] - \mathbb{D}_{\text{KL}}[\mu^\pi(s, s') || \mu^E(s, s')].$$

*Proof.* We can refer Eq (12) from the proof of Lemma 2:

$$\mathbb{D}_{\text{KL}}[\mu^\pi(s, a) || \mu^E(s, a)] = \mathbb{D}_{\text{KL}}[\mu^\pi(s, s') || \mu^E(s, s')] + \mathbb{D}_{\text{KL}}[\mu^\pi(a|s, s') || \mu^E(a|s, s')].$$

□

## 9.3 An Unoptimizable Gap Between LfO and LfD

**Remark 1:** In a non-injective MDP, the discrepancy of  $\mathbb{D}_{\text{KL}}[\mu^\pi(a|s, s') || \mu^E(a|s, s')]$  cannot be optimized without knowing expert actions.

*Proof.* We provide proof with a counter-example. Consider a non-injective MDP in a tabular case, whose transition dynamics is shown in Table 3, with  $|\mathcal{S}| = 3$ , and  $|\mathcal{A}| = 4$ . Especially, there exists two actions which lead to the same deterministic transition, i.e. for  $s_1, s_2 \in \mathcal{S}$ ,  $\exists a_0, a_2 \in \mathcal{A}$ , s.t.  $P(s_2|s_1, a_2) = P(s_2|s_1, a_0) = 1$ , as illustrated in Figure 5.

In this MDP, there is an *expert* policy  $\pi_E$  as listed in Table 5. Trajectories generated by this expert are illustrated as blue lines in Figure 5. In a LfO scenario, a learning agent only has access to sequences

| $P$                 | $a_0$ | $a_1$ | $a_2$ | $a_3$ |
|---------------------|-------|-------|-------|-------|
| $P(s_1 s_1, \cdot)$ | 0     | 1     | 0     | 0     |
| $P(s_2 s_1, \cdot)$ | 1     | 0     | 1     | 0     |
| $P(s_3 s_1, \cdot)$ | 0     | 0     | 0     | 1     |
| $P(s_1 s_2, \cdot)$ | 0     | 1     | 0     | 0     |
| $P(s_2 s_2, \cdot)$ | 0     | 0     | 1     | 0     |
| $P(s_3 s_2, \cdot)$ | 0     | 0     | 0     | 1     |
| $P(s_1 s_3, \cdot)$ | 0     | 1     | 0     | 0     |
| $P(s_2 s_3, \cdot)$ | 0     | 0     | 1     | 0     |
| $P(s_3 s_3, \cdot)$ | 0     | 0     | 0     | 1     |

Table 3: A deterministic but non-injective MDP.

| $\pi$ | $s_1$      | $s_2$ | $s_3$ |
|-------|------------|-------|-------|
| $a_0$ | <b>0.5</b> | 0     | 0     |
| $a_1$ | 0          | 0     | 1     |
| $a_2$ | <b>0.5</b> | 0     | 0     |
| $a_3$ | 0          | 1     | 0     |

| $\pi_E$ | $s_1$    | $s_2$ | $s_3$ |
|---------|----------|-------|-------|
| $a_0$   | 0        | 0     | 0     |
| $a_1$   | 0        | 0     | 1     |
| $a_2$   | <b>1</b> | 0     | 0     |
| $a_3$   | 0        | 1     | 0     |

Table 4: Learning Policy  $\pi$ . Table 5: Expert Policy  $\pi_E$ .

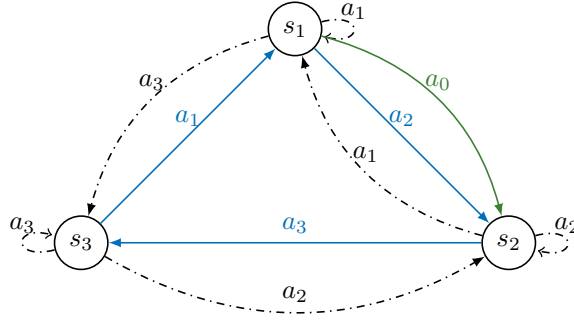

Figure 5: Transition of a non-injective MDP.

of states visited by the expert:  $\mathcal{R}_E = \{s_1, s_2, s_3, s_1, s_2, s_3, \dots\}$ , without knowing what actions have been taken by the expert.

Based on the given observations  $\mathcal{R}_E$ , a policy  $\pi$  can only satisfy the state distribution matching with  $\mathbb{D}_{\text{KL}}[\mu^\pi(s, s') || \mu^E(s, s')] = 0$ , but unable to optimize  $\mathbb{D}_{\text{KL}}[\mu^\pi(a|s, s') || \mu^E(a|s, s')]$ , as both  $a_0$  and  $a_2$  lead to a deterministic transition of  $s_1 \rightarrow s_2$ . In lack of expert actions, the best guess for a learning policy is to equally distribute action probabilities with  $\pi(a_0|s_1) = \pi(a_2|s_1) = 0.5$ , which results in  $\mu^\pi(a_0|s_1, s_2) = \mu^\pi(a_2|s_1, s_2) = 0.5$ , whereas  $\mu^E(a_2|s_1, s_2) = 1$ ,  $\mu^E(a_0|s_1, s_2) = 0$ . Consequently, we reach at  $\mathbb{D}_{\text{KL}}[\mu^\pi(a|s, s') || \mu^E(a|s, s')] > 0$ .  $\square$

**Remark:** In a deterministic and injective MDP, it satisfies that  $\forall \pi : \mathcal{S} \rightarrow \mathcal{A}$ ,  $\mathbb{D}_{\text{KL}}[\mu^\pi(a|s, s') || \mu^E(a|s, s')] = 0$ .

We provide proof in a finite, **discrete** state-action space, although the conclusion is valid to extend to continuous cases.

*Proof.* In a deterministic and injective MDP, we can interpret the transition dynamics with a *deterministic* function  $g$ :

$$\exists g : \mathcal{S} \times \mathcal{A} \rightarrow \mathcal{S}, \text{ s.t. } \forall (s, a, s'), g(s, a) = s' \iff P(s'|s, a) = 1, \text{ and } g(s, a) \neq s' \iff P(s'|s, a) = 0.$$

since this MDP is also injective, given arbitrary policy  $\pi$  and a transition  $s \rightarrow s'$ ,  $(s, s') \sim \mu^\pi(s, s')$ , there exists one and only action  $a$  which satisfies  $g(s, a) = s'$ ,  $P(s'|s, a) = 1$ .

Accordingly,  $\mu^\pi(a|s, s') = \frac{\pi(a|s)P(s'|s, a)}{\mathbb{E}_{\bar{a} \sim \pi(\cdot|s)}[P(s'|s, \bar{a})]} = \mathbb{1}[g(s, a) = s']$  depends only on the transition dynamics, where  $\mathbb{1}(x)$  is an indicator function. The same conclusion applies to  $\mu^E(a|s, s')$  as well. Therefore, we reach at:

$$\forall \pi : \mathcal{S} \rightarrow \mathcal{A}, \mathbb{D}_{\text{KL}}[\mu^\pi(a|s, s') || \mu^E(a|s, s')] = 0$$

$$\begin{aligned}
&= \mathbb{E}_{\mu^\pi(s,a,s')} \left[ \log \frac{\mathbb{1}[g(s,a) = s']}{\mathbb{1}[g(s,a) = s']} \right] \\
&= \mathbb{E}_{\mu^\pi(s,a,s')} \left[ \log \frac{1}{1} \right] = 0.
\end{aligned}$$

□

## 9.4 Upper-bound of the KL-Divergence

**Theorem 3.** For two arbitrary distributions  $P$  and  $Q$ , and an  $f$ -divergence with  $f(x) = \frac{1}{2}x^2$ , it satisfies that  $\mathbb{D}_{\text{KL}}[P||Q] \leq \mathbb{D}_f[P||Q]$ .

*Proof.* Given two distributions  $P$  and  $Q$ , their density ratio is denoted as  $w_{p|q}$ , with  $w_{p|q} = \frac{p(x)}{q(x)} \geq 0$ . If we consider a function  $g(w) = w \log(w) - \frac{1}{2}w^2$ ,  $g(w)$  is constantly decreasing when  $w \in (0, \infty)$ , as  $\frac{\partial g}{\partial w} = \log w + 1 - w \leq 0 \forall w \geq 0$ .

Since KL-Divergence is a special case of  $f$ -divergence with  $f_{\text{KL}}(x) = x \log x$ , it is sufficient to show that:

$$\begin{aligned}
\mathbb{D}_{\text{KL}}[P||Q] - \mathbb{D}_f[P||Q] &= \int_{\mathcal{X}} q(x) \left( w_{p/q} \log(w_{p/q}) - \frac{1}{2}(w_{p/q})^2 \right) dx \\
&\leq \int_{\mathcal{X}} q(x) \sup_{w \in (0, +\infty)} \left( w \log(w) - \frac{1}{2}w^2 \right) dx \\
&= \int_{\mathcal{X}} q(x) \lim_{w \rightarrow 0^+} \left( w \log(w) - \frac{1}{2}w^2 \right) dx \\
&= 0.
\end{aligned}$$

□

## 9.5 Forward Distribution Matching

### 9.5.1 Lower-bound of the BC Objective

**Theorem 4.**

$$\mathbb{D}_{\text{KL}}[\pi_E(a|s)||\pi(a|s)] = \mathbb{D}_{\text{KL}}[\mu^E(s'|s)||\mu^\pi(s'|s)] + \mathbb{D}_{\text{KL}}[\mu^E(a|s, s')||\mu^\pi(a|s, s')].$$

*Proof.* Based on the definition of  $\mu^\pi(a|s, s')$  in Table 1:

$$\mu^\pi(a|s, s') = \frac{\pi(a|s)P(s'|s, a)}{\int_{\mathcal{A}} \pi(\bar{a}|s)P(s'|s, \bar{a})d\bar{a}} = \frac{\pi(a|s)P(s'|s, a)}{\mu^\pi(s'|s)}, \quad (13)$$

and similar for  $\mu^E(a|s, s')$ , we can derive at the following:

$$\begin{aligned}
&\mathbb{D}_{\text{KL}}[\pi_E(a|s)||\pi(a|s)] \\
&= \int_{\mathcal{S} \times \mathcal{A}} \mu^E(s) \pi_E(a|s) \log \frac{\pi_E(a|s)}{\pi(a|s)} dad s \\
&= \int_{\mathcal{S} \times \mathcal{A}} \mu^E(s, a) \log \frac{\pi_E(a|s)}{\pi(a|s)} dad s \\
&= \int_{\mathcal{S} \times \mathcal{A} \times \mathcal{S}} \mu^E(s, a) P(s'|s, a) \log \frac{\pi_E(a|s)P(s'|s, a)}{\pi(a|s)P(s'|s, a)} ds' dad s \\
&= \int_{\mathcal{S} \times \mathcal{A} \times \mathcal{S}} \mu^E(s, a, s') \log \frac{\pi_E(a|s)P(s'|s, a)}{\pi(a|s)P(s'|s, a)} ds' dad s \\
&= \int_{\mathcal{S} \times \mathcal{A} \times \mathcal{S}} \mu^E(s, a, s') \underbrace{\log \frac{\mu^E(a|s, s')\mu^E(s'|s)}{\mu^\pi(a|s, s')\mu^\pi(s'|s)}}_{\text{Eq (13)}} ds' dad s
\end{aligned}$$

$$\begin{aligned}
&= \int_{\mathcal{S} \times \mathcal{A} \times \mathcal{S}} \mu^E(s, a, s') \left( \log \frac{\mu^E(a|s, s')}{\mu^\pi(a|s, s')} + \log \frac{\mu^E(s'|s)}{\mu^\pi(s'|s)} \right) ds' da ds \\
&= \int_{\mathcal{S} \times \mathcal{A} \times \mathcal{S}} \mu^E(s, a, s') \log \frac{\mu^E(a|s, s')}{\mu^\pi(a|s, s')} ds' da ds + \int_{\mathcal{S} \times \mathcal{A} \times \mathcal{S}} \mu^E(s, a, s') \log \frac{\mu^E(s'|s)}{\mu^\pi(s'|s)} ds' da ds \\
&= \mathbb{D}_{\text{KL}}[\mu^E(a|s, s') || \mu^\pi(a|s, s')] + \mathbb{D}_{\text{KL}}[\mu^E(s'|s) || \mu^\pi(s'|s)].
\end{aligned}$$

□

### 9.5.2 Policy Regularization as A Forward Distribution Matching

Without loss of generality, in this section we provide proof based on a finite, **discrete** state-action space.

**Assumption 1** (Deterministic MDP).  $\exists g : \mathcal{S} \times \mathcal{A} \rightarrow \mathcal{S}$  a deterministic function, s.t.  $\forall (s, a, s'), g(s, a) \neq s' \iff P(s'|s, a) = 0$ , and  $g(s, a) = s' \iff P(s'|s, a) = 1$ .

Based on Assumption 1, we have the following:

**Corollary 1.** In a deterministic MDP,  $\forall \pi : \mathcal{S} \rightarrow \mathcal{A}$ ,  $\mu^\pi(a|s, s') > 0 \implies P(a|s, s') = 1$ .

*Proof.*  $\mu^\pi(a|s, s') \propto \pi(a|s)P(s'|s, a) > 0 \implies P(s'|s, a) > 0$ . Based on Assumption 1, it holds that  $g(s, a) = s'$ , therefore  $P(s'|s, a) = 1$ . □

**Assumption 2** (Support Coverage). The support of expert transition distribution  $\mu^E(s, s')$  is covered by  $\mu^R(s, s')$ :

$$\mu^E(s, s') > 0 \implies \mu^R(s, s') > 0.$$

Combing Corollary 1 and Assumption 2, we can reach at the following:

**Corollary 2.**  $\forall (s, s') \sim \mu^E(s, s'), \mu^R(a|s, s') > 0 \implies P(a|s, s') = 1$ .

**Lemma 3.** Given a policy  $\hat{\pi}$ , s.t.  $\forall (s, s') \sim \mu^E(s, s'), \hat{\pi}(a|s) \propto \mu^R(a|s, s')$ , then it satisfies that:

$$\forall \pi : \mathcal{S} \rightarrow \mathcal{A}, \mathbb{D}_{\text{KL}}[\mu^E(s'|s) || \mu^\pi(s'|s)] \geq \mathbb{D}_{\text{KL}}[\mu^E(s'|s) || \mu^{\hat{\pi}}(s'|s)].$$

*Proof.* In a discrete state-action space,  $\mu^\pi(s'|s)$  can be denoted as  $\mu^\pi(s'|s) = \mathbb{E}_{a \sim \pi(\cdot|s)}[P(s'|s, a)]$ , and the similar for  $\mu^{\hat{\pi}}(s'|s)$ :

$$\begin{aligned}
&\mathbb{D}_{\text{KL}}[\mu^E(s'|s) || \mu^{\hat{\pi}}(s'|s)] - \mathbb{D}_{\text{KL}}[\mu^E(s'|s) || \mu^\pi(s'|s)] \\
&= \mathbb{E}_{\mu^E(s, s')} \left[ \log \frac{\mu^E(s'|s)}{\mu^{\hat{\pi}}(s'|s)} - \log \frac{\mu^E(s'|s)}{\mu^\pi(s'|s)} \right] \\
&= \mathbb{E}_{\mu^E(s, s')} [\log \mu^\pi(s'|s)] - \log \mu^{\hat{\pi}}(s'|s) \\
&= \mathbb{E}_{\mu^E(s, s')} [\log \mathbb{E}_{a \sim \pi(\cdot|s)}[P(s'|s, a)]] - \mathbb{E}_{\mu^E(s, s')} [\log \mathbb{E}_{a \sim \hat{\pi}(\cdot|s)}[P(s'|s, a)]] \\
&= \mathbb{E}_{\mu^E(s, s')} [\log \mathbb{E}_{a \sim \pi(\cdot|s)}[P(s'|s, a)]] - \mathbb{E}_{\mu^E(s, s')} [\log \mathbb{E}_{a \sim \mu^R(\cdot|s, s')}[P(s'|s, a)]] \\
&= \mathbb{E}_{\mu^E(s, s')} [\log \mathbb{E}_{a \sim \pi(\cdot|s)}[P(s'|s, a)]] - \mathbb{E}_{\mu^E(s, s')} \underbrace{[\log \mathbb{E}_{a \sim \mu^R(\cdot|s, s')}[1]]}_{\text{Corollary 2}} \\
&= \mathbb{E}_{\mu^E(s, s')} [\log \mathbb{E}_{a \sim \pi(\cdot|s)}[P(s'|s, a)]] \\
&\leq \mathbb{E}_{\mu^E(s, s')} [\log \mathbb{E}_{a \sim \pi(\cdot|s)}[1]] \\
&= 0.
\end{aligned}$$

□

**Remark 2.** In a deterministic MDP, assuming the support of  $\mu^E(s, s')$  is covered by  $\mu^R(s, s')$ , s.t.  $\mu^E(s, s') > 0 \implies \mu^R(s, s') > 0$ , then regulating policy using  $\mu^R(\cdot|s, s')$  can minimize  $\mathbb{D}_{\text{KL}}[\mu^E(s'|s) || \mu^\pi(s'|s)]$ :

$$\exists \tilde{\pi} : \mathcal{S} \rightarrow \mathcal{A}, \text{ s.t. } \forall (s, s') \sim \mu^E(s, s'), \tilde{\pi}(\cdot|s) \propto \mu^R(\cdot|s, s') \implies \tilde{\pi} = \arg \min_{\pi} \mathbb{D}_{\text{KL}}[\mu^E(s'|s) || \mu^\pi(s'|s)].$$

*Proof.* Based on Lemma 3, we have that:

$$\forall \pi : \mathcal{S} \rightarrow \mathcal{A}, \mathbb{D}_{\text{KL}}[\mu^E(s'|s) || \mu^\pi(s'|s)] \geq \mathbb{D}_{\text{KL}}[\mu^E(s'|s) || \mu^{\tilde{\pi}}(s'|s)].$$

Therefore,  $\tilde{\pi} = \arg \min_{\pi} \mathbb{D}_{\text{KL}}[\mu^E(s'|s) || \mu^\pi(s'|s)]$ .

□

### 9.5.3 Estimating the Inverse Action Distribution

**Theorem 5.**

$$\max_{P_I: \mathcal{S} \times \mathcal{S} \rightarrow \mathcal{A}} -\mathbb{D}_{\text{KL}}[\mu^R(a|s, s') || P_I(a|s, s')] \equiv \max_{P_I: \mathcal{S} \times \mathcal{S} \rightarrow \mathcal{A}} \mathbb{E}_{(s, a, s') \sim \mu^R(s, a, s')} [\log P_I(a|s, s')].$$

*Proof.*

$$\begin{aligned} & -\mathbb{D}_{\text{KL}}[\mu^R(a|s, s') || P_I(a|s, s')] \\ &= -\int_{\mathcal{S} \times \mathcal{S} \times \mathcal{A}} \mu^R(s, s') \mu^R(a|s, s') \log \frac{\mu^R(a|s, s')}{P_I(a|s, s')} dad s ds' \\ &= -\int_{\mathcal{S} \times \mathcal{S} \times \mathcal{A}} \mu^R(s, s') \mu^R(a|s, s') \left( \log \mu^R(a|s, s') - \log P_I(a|s, s') \right) dad s ds' \\ &= \underbrace{H[\mu^R(a|s, s')]}_{\text{fixed w.r.t. } P_I} + \int_{\mathcal{S} \times \mathcal{S} \times \mathcal{A}} \mu^R(s, s') \mu^R(a|s, s') \log P_I(a|s, s') dad s ds' \\ &= \underbrace{H[\mu^R(a|s, s')]}_{\text{fixed w.r.t. } P_I} + \mathbb{E}_{\mu^R(s, a, s')} [\log P_I(a|s, s')]. \end{aligned}$$

□

Note that we use  $H[\mu^R(a|s, s')]$  to denote the conditional entropy of  $\mu^R(a|s, s')$ , with  $H[\mu^R(a|s, s')] = \mathbb{E}_{\mu^R(s, a, s')} [-\log \mu^R(a|s, s')]$ .

### 9.6 Derivation of Eq (8):

$$J_{\text{opolo}}(\pi, Q) = \mathbb{E}_{(s, a, s') \sim \mu^\pi(s, a, s')} [r(s, s') - (\mathcal{B}^\pi Q - Q)(s, a)] + \mathbb{E}_{(s, a) \sim \mu^R(s, a)} [f_*((\mathcal{B}^\pi Q - Q)(s, a))],$$

where  $\mathcal{B}^\pi Q(s, a) = \mathbb{E}_{s' \sim P(\cdot|s, a), a' \sim \pi(\cdot|s')} [r(s, s') + \gamma Q(s', a')]$ , and  $r(s, s') = \log \frac{\mu^E(s, s')}{\mu^R(s, s')}$ .

*Proof.* The first term in the RHS of the above equation can be reduced to the following:

$$\begin{aligned} & \mathbb{E}_{(s, a, s') \sim \mu^\pi(s, a, s')} [r(s, s') - (\mathcal{B}^\pi Q - Q)(s, a)] \\ &= \mathbb{E}_{(s, a) \sim \mu^\pi(s, a)} \left[ \mathbb{E}_{s' \sim P(\cdot|s, a)} [r(s, s') - ((\mathcal{B}^\pi Q - Q)(s, a))] \right] \\ &= \mathbb{E}_{(s, a) \sim \mu^\pi(s, a)} \left[ \mathbb{E}_{s' \sim P(\cdot|s, a)} [r(s, s')] + Q(s, a) - \mathbb{E}_{s' \sim P(\cdot|s, a)} [\mathcal{B}^\pi Q(s, a)] \right] \\ &= \mathbb{E}_{(s, a) \sim \mu^\pi(s, a)} \left[ \mathbb{E}_{s' \sim P(\cdot|s, a)} [\overline{r(s, s')}] + Q(s, a) - \mathbb{E}_{s' \sim P(\cdot|s, a), a' \sim \pi(\cdot|s')} [\overline{r(s, s')} + \gamma Q(s', a')] \right] \\ &= \mathbb{E}_{(s, a) \sim \mu^\pi(s, a)} \left[ Q(s, a) - \gamma \mathbb{E}_{s' \sim P(\cdot|s, a), a' \sim \pi(\cdot|s')} [Q(s', a')] \right] \\ &= (1 - \gamma) \underbrace{\sum_{t=0}^{\infty} \gamma^t \mathbb{E}_{s \sim \mu_t^\pi(s), a \sim \pi(s)} [Q(s, a)]}_{\text{see Table 1}} - (1 - \gamma) \sum_{t=0}^{\infty} \gamma^{t+1} \mathbb{E}_{s \sim \mu_t^\pi(s), a \sim \pi(\cdot|s), s' \sim P(\cdot|s, a), a' \sim \pi(\cdot|s')} [Q(s', a')] \\ &= (1 - \gamma) \sum_{t=0}^{\infty} \gamma^t \mathbb{E}_{s \sim \mu_t^\pi(s), a \sim \pi(s)} [Q(s, a)] - (1 - \gamma) \sum_{t=0}^{\infty} \gamma^{t+1} \mathbb{E}_{s \sim \mu_{t+1}^\pi(s), a \sim \pi(\cdot|s)} [Q(s, a)] \\ &= (1 - \gamma) \mathbb{E}_{s \sim p_0, a_0 \sim \pi(\cdot|s_0)} [Q(s_0, a_0)]. \end{aligned}$$

Therefore:

$$J_{\text{opolo}}(\pi, Q) = (1 - \gamma) \mathbb{E}_{s \sim p_0, a_0 \sim \pi(\cdot|s_0)} [Q(s_0, a_0)] + \mathbb{E}_{(s, a) \sim \mu^R} [f_*((\mathcal{B}^\pi Q - Q)(s, a))].$$

□

## 9.7 Implementation Details

### 9.7.1 Practical Considerations for Algorithm Implementation

We provide some practical considerations to effectively implement our algorithm:

**Initial state sampling:** To increase the diversity of initial samples, we use state samples from an off-policy buffer and treat them as *virtual initial states*. A similar strategy is adopted by [3].

**Constant shift on synthetic rewards:** In practice, we adopt the same strategy of prior art [10] to use  $r(s, s') = -\log(1 - D(s, s'))$ , instead of  $\log(D) - \log(1 - D)$  as the discriminator output. A fully optimized discriminator  $D^*$  satisfies  $-\log(1 - D^*(s, s')) = \log(1 + \frac{\mu^E(s, s')}{\mu^R(s, s')})$ , which corresponds to a constant shift on  $\frac{\mu^E(s, s')}{\mu^R(s, s')}$  before the log term.

**Q and  $\pi$  network update:** We follow the advice of AlgeaDICE [31] by using a target Q network and policy gradient clipping. Especially, when taking the gradients of  $J_{\text{opolo}}(\pi, Q, \alpha)$  w.r.t.  $Q$ , we use the value from a target Q network to calculate  $\mathcal{B}^\pi Q(s, a)$  in order to stabilize training; on the other hand, since an optimal  $x^*(s, a) = (\mathcal{B}^\pi Q^* - Q^*)(s, a) = \frac{\mu^\pi(s, a)}{\mu^R(s, a)}$  represents a density ratio and should always be non-negative, we clip  $(\mathcal{B}^\pi Q - Q)(s, a)$  to above 0 when taking gradients w.r.t.  $\pi$ .

### 9.7.2 Hyper-parameters

Table 6 lists the hyper-parameters for GAIL [2], GAIfo [9], BCO [17], DAC [4], and our proposed approach *OPOLO*. Specifically, for off-policy approaches, each self-generated interaction will be stored the replay buffer in a FIFO manner, and *update frequency* is the number of interactions sampled from the MDP after which the module is updated. Moreover, considering the different scales for the gradients of  $J(\pi_\theta, Q_\phi)$  and  $J_{\text{Reg}}(\pi_\theta)$  in Algorithm 1, we apply a coefficient  $\lambda$  for *OPOLO* to adjust the regularization strength when calculating the total policy loss:

$$\theta \leftarrow \theta + \alpha(J_{\nabla\theta}(\pi_\theta, Q_\phi) + \lambda J_{\nabla\theta} J_{\text{Reg}}(\pi_\theta)).$$

| Hyper-parameters                                   | Value          |
|----------------------------------------------------|----------------|
| <b>Shared Parameters for Off-Policy Approaches</b> |                |
| Buffer size                                        | $10^7$         |
| Batch size                                         | 100            |
| Learning rate                                      | $3e^{-4}$      |
| Discount factor $\gamma$                           | 0.99           |
| Network architecture                               | MLP [400, 300] |
| $Q, \pi$ update frequency / gradient steps         | $10^3/10^3$    |
| $D$ update frequency / gradient steps              | 500/10         |
| <b>Shared Parameters for On-Policy Approaches</b>  |                |
| Batch size                                         | 2048           |
| mini-Batch size                                    | 256            |
| Learning rate                                      | $3e^{-4}$      |
| Discount factor $\gamma$                           | 0.99           |
| Network architecture                               | MLP [400, 300] |
| <b>BCO</b>                                         |                |
| $P_I$ pre-train gradient steps                     | $10^4$         |
| $P_I$ update frequency / gradient steps            | $10^3/100$     |
| <b>DAC</b>                                         |                |
| Number of extra absorbing states                   | 1              |
| <b>OPOLO</b>                                       |                |
| $P_I$ update frequency / gradient steps            | 500/50         |
| $P_I$ regularization coefficient $\lambda$         | 0.1            |

Table 6: Hyper-parameters for Different Algorithms

## 9.8 Challenges of DICE without Expert Actions

In this section, we analyze the principle of offline imitation learning using DICE [30, 33, 31] and the reason that impedes its direct application to an LfO setting.

In a LfO setting where expert actions are unavailable, the learning objective is to minimize the discrepancy of *state-only* distributions induced by the agent and the expert. Without loss of generality, we consider an arbitrary f-divergence  $\mathbb{D}_f$  as the discrepancy measure:

$$\begin{aligned} & \max_{\pi} -\mathbb{D}_f[\mu^{\pi}(s, s') || \mu^E(s, s')] \\ & = \max_{\pi} \min_{x: \mathcal{S} \times \mathcal{S} \rightarrow \mathbb{R}} \mathbb{E}_{\mu^{\pi}(s, s')}[-x(s, s')] + \mathbb{E}_{\mu^E(s, s')} [f^*(x(s, s'))], \end{aligned} \quad (14)$$

in which  $f^*(x)$  is the conjugate of  $f(x)$  for the  $f$ -divergence. To remove the on-policy dependence of  $\mu^{\pi}(s, s')$ , we follow the rationale of DICE and use a similar change-of-variable trick mentioned in Sec 3.2 to learn a value function  $v(s, s')$ :

$$v(s, s') := -x(s, s') + \gamma \mathbb{E}_{a' \sim \pi(\cdot | s'), s'' \sim P(\cdot | s', a')} [v(s', s'')] = -x(s, s') + \mathcal{B}^{\pi} v(s, s').$$

This value function is a fixed point solution to an variant Bellman operator  $\mathcal{B}^{\pi}$ , which, however, is problematic in a model-free setting. To see this, we substitute  $x(s, s')$  by  $(\mathcal{B}^{\pi} v - v)(s, s')$  to transform Eq (14) into the following:

$$\begin{aligned} & \max_{\pi} \min_{x: \mathcal{S} \times \mathcal{S} \rightarrow \mathbb{R}} \mathbb{E}_{\mu^{\pi}(s, s')} [-x(s, s')] + \mathbb{E}_{\mu^E(s, s')} [f^*(x(s, s'))] \\ & = \max_{\pi} \min_{v: \mathcal{S} \times \mathcal{S} \rightarrow \mathbb{R}} (1 - \gamma) \underbrace{\mathbb{E}_{s_0 \sim p_0, s_1 \sim P(\cdot | s_0, \pi(s_0))} [v(s_0, s_1)]}_{\text{term 1}} + \underbrace{\mathbb{E}_{\mu^E(s, s')} [f^*((\mathcal{B}^{\pi} v - v)(s, s'))]}_{\text{term 2}}. \end{aligned}$$

where  $\mathcal{B}^{\pi} v(s, s') = \gamma \mathbb{E}_{a' \sim \pi(\cdot | s'), s'' \sim P(\cdot | s', a')} [v(s', s'')]$ . Optimizing this objective is troublesome, in that the  $\mathcal{B}^{\pi} v(s, s')$  in term 2 requires knowledge of  $P(\cdot | s, \pi(s))$ ,  $\forall s \sim \mu^E(s)$ . In another word, for any state sampled from the *expert* distribution, we need to know what would be the *next* state if following policy  $\pi$  from this state. A similar issue is echoed in term 1, where  $s_1$  is sampled from  $P(\cdot | s_0, \pi(s_0))$ . Consequently, directly applying DICE loses its advantage in a LfO setting, as it incurs a dependence on a *forward transition* model, which is costly to estimate and may counteract the efficiency brought by off-policy learning.
